# Supplementary material
Source: PubMed Central journal article supplement (PMC8498721)
Supplement: mmc1.pdf [file mmc1.pdf]

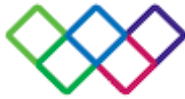

IMPACT EVALUATION OF COVID-19 ON HOSPITAL HEALTHCARE WORKERS

*Thank you for taking time to complete this questionnaire We are evaluating the impact of COVID-19 on healthcare workers at our two main hospitals. The information collected is anonymous. Participation in this evaluation is voluntary. Thank you for your input.*

|                   |                                                                                     |                                       |                                                                                                                                                                             |
|-------------------|-------------------------------------------------------------------------------------|---------------------------------------|-----------------------------------------------------------------------------------------------------------------------------------------------------------------------------|
| Questionnaire No. | <input type="text"/> <input type="text"/> <input type="text"/> <input type="text"/> | Date of questionnaire<br>(dd/mm/yyyy) | <input type="text"/> <input type="text"/> / <input type="text"/> <input type="text"/> / <input type="text"/> <input type="text"/> <input type="text"/> <input type="text"/> |
|-------------------|-------------------------------------------------------------------------------------|---------------------------------------|-----------------------------------------------------------------------------------------------------------------------------------------------------------------------------|

**Personal and professional details**

|                                                                                                                                                                                                                                                                                                                                                                                                                                                                                                                                                                       |                                                                                                                                                                                                                                                                                                                                                                                                                                                                                                                                                                                                                                                                                                                                                                                                                                                                                                                                                                                                                                                                                                                                                                                                                                                                                                                                                                                                 |                                                                                                                                                                                                                                                                                                                                                                                                                                                                                                                                                                       |                                                                                                                                                                                                                                                                                                                                                                                                                                                                                                                                                                                                                                                |
|-----------------------------------------------------------------------------------------------------------------------------------------------------------------------------------------------------------------------------------------------------------------------------------------------------------------------------------------------------------------------------------------------------------------------------------------------------------------------------------------------------------------------------------------------------------------------|-------------------------------------------------------------------------------------------------------------------------------------------------------------------------------------------------------------------------------------------------------------------------------------------------------------------------------------------------------------------------------------------------------------------------------------------------------------------------------------------------------------------------------------------------------------------------------------------------------------------------------------------------------------------------------------------------------------------------------------------------------------------------------------------------------------------------------------------------------------------------------------------------------------------------------------------------------------------------------------------------------------------------------------------------------------------------------------------------------------------------------------------------------------------------------------------------------------------------------------------------------------------------------------------------------------------------------------------------------------------------------------------------|-----------------------------------------------------------------------------------------------------------------------------------------------------------------------------------------------------------------------------------------------------------------------------------------------------------------------------------------------------------------------------------------------------------------------------------------------------------------------------------------------------------------------------------------------------------------------|------------------------------------------------------------------------------------------------------------------------------------------------------------------------------------------------------------------------------------------------------------------------------------------------------------------------------------------------------------------------------------------------------------------------------------------------------------------------------------------------------------------------------------------------------------------------------------------------------------------------------------------------|
| 1. What is your age?                                                                                                                                                                                                                                                                                                                                                                                                                                                                                                                                                  | <input type="checkbox"/> less than 20 <input type="checkbox"/> 20 - 29 <input type="checkbox"/> 30 - 39 <input type="checkbox"/> 40 – 49<br><input type="checkbox"/> 50 - 59 <input type="checkbox"/> 60 - 69 <input type="checkbox"/> 70 and above                                                                                                                                                                                                                                                                                                                                                                                                                                                                                                                                                                                                                                                                                                                                                                                                                                                                                                                                                                                                                                                                                                                                             |                                                                                                                                                                                                                                                                                                                                                                                                                                                                                                                                                                       |                                                                                                                                                                                                                                                                                                                                                                                                                                                                                                                                                                                                                                                |
| 2. What is your sex?                                                                                                                                                                                                                                                                                                                                                                                                                                                                                                                                                  | <input type="checkbox"/> Male <input type="checkbox"/> Female                                                                                                                                                                                                                                                                                                                                                                                                                                                                                                                                                                                                                                                                                                                                                                                                                                                                                                                                                                                                                                                                                                                                                                                                                                                                                                                                   |                                                                                                                                                                                                                                                                                                                                                                                                                                                                                                                                                                       |                                                                                                                                                                                                                                                                                                                                                                                                                                                                                                                                                                                                                                                |
| 3. What is your ethnicity?                                                                                                                                                                                                                                                                                                                                                                                                                                                                                                                                            | <table border="0"> <tr> <td style="vertical-align: top;"> <p><b>White</b></p> <input type="checkbox"/> English/Welsh/Scottish/Northern Irish/British<br/> <input type="checkbox"/> Irish<br/> <input type="checkbox"/> Gypsy or Irish Traveller<br/> <input type="checkbox"/> Any other White background(<i>specify</i>)<br/>           ..... <p><b>Mixed / Multiple ethnic groups</b></p> <input type="checkbox"/> White and Black Caribbean<br/> <input type="checkbox"/> White and Black African<br/> <input type="checkbox"/> White and Asian<br/> <input type="checkbox"/> Any other Mixed/Multiple ethnic background(<i>specify</i>)<br/>           ..... </td> <td style="vertical-align: top;"> <p><b>Asian / Asian British</b></p> <input type="checkbox"/> Indian<br/> <input type="checkbox"/> Pakistani<br/> <input type="checkbox"/> Bangladeshi<br/> <input type="checkbox"/> Chinese<br/> <input type="checkbox"/> Any other Asian background (<i>specify</i>)..... <p><b>Black/African/Caribbean/Black British</b></p> <input type="checkbox"/> African<br/> <input type="checkbox"/> Caribbean<br/> <input type="checkbox"/> Any other Black/African/Caribbean background (<i>specify</i>)..... <p><b>Other ethnic group</b></p> <input type="checkbox"/> Arab<br/> <input type="checkbox"/> Any other ethnic group (<i>specify</i>)<br/>           ..... </td> </tr> </table> | <p><b>White</b></p> <input type="checkbox"/> English/Welsh/Scottish/Northern Irish/British<br><input type="checkbox"/> Irish<br><input type="checkbox"/> Gypsy or Irish Traveller<br><input type="checkbox"/> Any other White background( <i>specify</i> )<br>..... <p><b>Mixed / Multiple ethnic groups</b></p> <input type="checkbox"/> White and Black Caribbean<br><input type="checkbox"/> White and Black African<br><input type="checkbox"/> White and Asian<br><input type="checkbox"/> Any other Mixed/Multiple ethnic background( <i>specify</i> )<br>..... | <p><b>Asian / Asian British</b></p> <input type="checkbox"/> Indian<br><input type="checkbox"/> Pakistani<br><input type="checkbox"/> Bangladeshi<br><input type="checkbox"/> Chinese<br><input type="checkbox"/> Any other Asian background ( <i>specify</i> )..... <p><b>Black/African/Caribbean/Black British</b></p> <input type="checkbox"/> African<br><input type="checkbox"/> Caribbean<br><input type="checkbox"/> Any other Black/African/Caribbean background ( <i>specify</i> )..... <p><b>Other ethnic group</b></p> <input type="checkbox"/> Arab<br><input type="checkbox"/> Any other ethnic group ( <i>specify</i> )<br>..... |
| <p><b>White</b></p> <input type="checkbox"/> English/Welsh/Scottish/Northern Irish/British<br><input type="checkbox"/> Irish<br><input type="checkbox"/> Gypsy or Irish Traveller<br><input type="checkbox"/> Any other White background( <i>specify</i> )<br>..... <p><b>Mixed / Multiple ethnic groups</b></p> <input type="checkbox"/> White and Black Caribbean<br><input type="checkbox"/> White and Black African<br><input type="checkbox"/> White and Asian<br><input type="checkbox"/> Any other Mixed/Multiple ethnic background( <i>specify</i> )<br>..... | <p><b>Asian / Asian British</b></p> <input type="checkbox"/> Indian<br><input type="checkbox"/> Pakistani<br><input type="checkbox"/> Bangladeshi<br><input type="checkbox"/> Chinese<br><input type="checkbox"/> Any other Asian background ( <i>specify</i> )..... <p><b>Black/African/Caribbean/Black British</b></p> <input type="checkbox"/> African<br><input type="checkbox"/> Caribbean<br><input type="checkbox"/> Any other Black/African/Caribbean background ( <i>specify</i> )..... <p><b>Other ethnic group</b></p> <input type="checkbox"/> Arab<br><input type="checkbox"/> Any other ethnic group ( <i>specify</i> )<br>.....                                                                                                                                                                                                                                                                                                                                                                                                                                                                                                                                                                                                                                                                                                                                                  |                                                                                                                                                                                                                                                                                                                                                                                                                                                                                                                                                                       |                                                                                                                                                                                                                                                                                                                                                                                                                                                                                                                                                                                                                                                |
| 4. Which of the two hospitals do you predominantly work at?                                                                                                                                                                                                                                                                                                                                                                                                                                                                                                           | <input type="checkbox"/> Chelsea and Westminster Hospital<br><input type="checkbox"/> West Middlesex Hospital<br><input type="checkbox"/> Both                                                                                                                                                                                                                                                                                                                                                                                                                                                                                                                                                                                                                                                                                                                                                                                                                                                                                                                                                                                                                                                                                                                                                                                                                                                  |                                                                                                                                                                                                                                                                                                                                                                                                                                                                                                                                                                       |                                                                                                                                                                                                                                                                                                                                                                                                                                                                                                                                                                                                                                                |

|                                                                                                                                |                                                                                                                                                                                                                                                                                                                                             |                                                                                                                                                                                                                                                                                                                                                             |
|--------------------------------------------------------------------------------------------------------------------------------|---------------------------------------------------------------------------------------------------------------------------------------------------------------------------------------------------------------------------------------------------------------------------------------------------------------------------------------------|-------------------------------------------------------------------------------------------------------------------------------------------------------------------------------------------------------------------------------------------------------------------------------------------------------------------------------------------------------------|
| <p>5. What is your occupation?</p>                                                                                             | <input type="checkbox"/> Medical Doctor<br><input type="checkbox"/> Registered Nurse<br><input type="checkbox"/> Healthcare assistant/assistant practitioner<br><input type="checkbox"/> Radiographer<br><input type="checkbox"/> Laboratory personnel<br><input type="checkbox"/> Phlebotomist<br><input type="checkbox"/> Physiotherapist | <input type="checkbox"/> Nutritionist/Dietician<br><input type="checkbox"/> Patient transporter<br><input type="checkbox"/> Clerical officer / administrative staff<br><input type="checkbox"/> Catering staff<br><input type="checkbox"/> Cleaner<br><input type="checkbox"/> Security guard<br><input type="checkbox"/> Other ( <i>specify</i> )<br>..... |
| <p>6. Approximately how many weeks, to the nearest whole number, have you worked in the hospital for the following months?</p> | March <input type="checkbox"/> week/s<br>April <input type="checkbox"/> week/s<br>May <input type="checkbox"/> week/s<br>June <input type="checkbox"/> week/s                                                                                                                                                                               |                                                                                                                                                                                                                                                                                                                                                             |
| <p>7. Which department do you predominantly work in?</p>                                                                       | <input type="checkbox"/> Emergency Department<br><input type="checkbox"/> Inpatient ward (any)<br><input type="checkbox"/> Intensive Care Unit<br><input type="checkbox"/> Outpatients<br><input type="checkbox"/> Other ( <i>specify</i> ).....                                                                                            |                                                                                                                                                                                                                                                                                                                                                             |
| <p><b>Personal illness</b></p>                                                                                                 |                                                                                                                                                                                                                                                                                                                                             |                                                                                                                                                                                                                                                                                                                                                             |
| <p>8. At any time since the 1<sup>st</sup> of March 2020, have you had any symptoms of COVID-19?</p>                           | <input type="checkbox"/> Yes<br><input type="checkbox"/> No                      → If NO, go to Question 12<br><input type="checkbox"/> Unsure                                                                                                                                                                                              |                                                                                                                                                                                                                                                                                                                                                             |
| <p>9. If YES, which symptoms did you develop?</p>                                                                              | <input type="checkbox"/> Fever / high temperature<br><input type="checkbox"/> New cough<br><input type="checkbox"/> Shortness of breath<br><input type="checkbox"/> Sore throat<br><input type="checkbox"/> Muscle pain<br><input type="checkbox"/> Fatigue                                                                                 | <input type="checkbox"/> Headache<br><input type="checkbox"/> Loss of sense of smell and/or taste<br><input type="checkbox"/> Diarrhoea<br><input type="checkbox"/> Vomiting<br><input type="checkbox"/> Nausea<br><input type="checkbox"/> Other( <i>specify</i> ).....                                                                                    |
| <p>10. When did your symptoms begin?</p>                                                                                       | <input type="checkbox"/> Less than 7 days ago<br><input type="checkbox"/> 7-14 days ago<br><input type="checkbox"/> 15-21 days ago<br><input type="checkbox"/> More than 21 days ago                                                                                                                                                        |                                                                                                                                                                                                                                                                                                                                                             |

|                                                                                                                                                                                                                                      |                                                                                                                                                                                                                                                                                                                                                                                                                                                                                                                                                                                                                                                                         |                             |                                                                                                                 |
|--------------------------------------------------------------------------------------------------------------------------------------------------------------------------------------------------------------------------------------|-------------------------------------------------------------------------------------------------------------------------------------------------------------------------------------------------------------------------------------------------------------------------------------------------------------------------------------------------------------------------------------------------------------------------------------------------------------------------------------------------------------------------------------------------------------------------------------------------------------------------------------------------------------------------|-----------------------------|-----------------------------------------------------------------------------------------------------------------|
| 11. (a) At any time since the 1 <sup>st</sup> of March 2020, have you self-isolated after developing COVID-19 like symptoms?                                                                                                         | <input type="checkbox"/> Yes<br><input type="checkbox"/> No                                                                                                                                                                                                                                                                                                                                                                                                                                                                                                                                                                                                             | (b) If YES how many times?  | <input type="checkbox"/> Once<br><input type="checkbox"/> Twice<br><input type="checkbox"/> Three times or more |
| 12. (a) At any time since the 1 <sup>st</sup> of March 2020, have you self-isolated after being in contact with someone with COVID-19 like symptoms?                                                                                 | <input type="checkbox"/> Yes<br><input type="checkbox"/> No                                                                                                                                                                                                                                                                                                                                                                                                                                                                                                                                                                                                             | (b) If YES how many times?  | <input type="checkbox"/> Once<br><input type="checkbox"/> Twice<br><input type="checkbox"/> Three times or more |
| 13. Have you ever had a COVID-19 positive test result on a swab (or other) sample?                                                                                                                                                   |                                                                                                                                                                                                                                                                                                                                                                                                                                                                                                                                                                                                                                                                         |                             |                                                                                                                 |
| <input type="checkbox"/> Yes                                                                                                                                                                                                         |                                                                                                                                                                                                                                                                                                                                                                                                                                                                                                                                                                                                                                                                         | <input type="checkbox"/> No |                                                                                                                 |
| <b>Family and travel exposures</b>                                                                                                                                                                                                   |                                                                                                                                                                                                                                                                                                                                                                                                                                                                                                                                                                                                                                                                         |                             |                                                                                                                 |
| 14. In your house, how many people of the following age groups are there? ( <i>enter number in boxes provided</i> )                                                                                                                  | Adults (18+ years) <input type="text"/> <input type="text"/> <input type="text"/><br>Children (<18 years) <input type="text"/> <input type="text"/> <input type="text"/>                                                                                                                                                                                                                                                                                                                                                                                                                                                                                                |                             |                                                                                                                 |
| 15. Have any of the people in your household been symptomatic for possible COVID-19?                                                                                                                                                 | <input type="checkbox"/> Yes, starting before I became unwell<br><input type="checkbox"/> Yes, starting at similar time/after me<br><input type="checkbox"/> No                                                                                                                                                                                                                                                                                                                                                                                                                                                                                                         |                             |                                                                                                                 |
| 16. Have any of your household contacts had a positive COVID-19 swab test?                                                                                                                                                           | <input type="checkbox"/> Yes, before I became unwell<br><input type="checkbox"/> Yes, at a similar time/after I became unwell<br><input type="checkbox"/> No                                                                                                                                                                                                                                                                                                                                                                                                                                                                                                            |                             |                                                                                                                 |
| 17. At any time since the 1 <sup>st</sup> of March 2020, have you had any contact (within 2 metres) at a social gathering with a person who was later suspected/confirmed to have COVID-19 swab test within 7 days of the gathering? | <input type="checkbox"/> Yes<br><input type="checkbox"/> No / not to my knowledge                                                                                                                                                                                                                                                                                                                                                                                                                                                                                                                                                                                       |                             |                                                                                                                 |
| 18. How do you normally get to work? (Tick all that apply and fill the approximate time for each )                                                                                                                                   | <input type="checkbox"/> Train <input type="text"/> <input type="text"/> <input type="text"/> minutes<br><input type="checkbox"/> Bus. <input type="text"/> <input type="text"/> <input type="text"/> minutes<br><input type="checkbox"/> Car <input type="text"/> <input type="text"/> <input type="text"/> minutes<br><input type="checkbox"/> Bicycle <input type="text"/> <input type="text"/> <input type="text"/> minutes<br><input type="checkbox"/> Walk <input type="text"/> <input type="text"/> <input type="text"/> minutes<br><input type="checkbox"/> Other( <i>specify</i> )..... <input type="text"/> <input type="text"/> <input type="text"/> minutes |                             |                                                                                                                 |
| 19. How long is your commute to work (minutes) in total ?                                                                                                                                                                            | <input type="text"/> <input type="text"/> <input type="text"/> minutes                                                                                                                                                                                                                                                                                                                                                                                                                                                                                                                                                                                                  |                             |                                                                                                                 |

The following questions ask about contact with COVID 19 patients.

By “ **contact with COVID-19**”, we mean being in the same room or place with a patient with confirmed or suspected COVID-19 OR contact with a COVID-19 patient’s respiratory or digestive secretions OR contact with a specimen (e.g. nasal swab) from such a COVID-19 patient before the sample was packaged.

**Aerosol-generating procedures** include intubation, extubation, open suctioning, tracheostomy, upper gastrointestinal endoscopy with open suctioning, bronchoscopy, surgery (including post mortem) involving high speed devices, high-speed dental drilling, non-invasive ventilation, high frequency oscillatory ventilation, induction of sputum and high flow nasal oxygen

If you had **any contact with patients**, go to question 20

If you **did not have contact with patients**, go to question 23

**Patient care related exposures**

|                                                                                                                                                                                                                   |                                                                                                                                                                                     |                                                          |
|-------------------------------------------------------------------------------------------------------------------------------------------------------------------------------------------------------------------|-------------------------------------------------------------------------------------------------------------------------------------------------------------------------------------|----------------------------------------------------------|
| 20. Estimate the average number of days per week (to nearest whole day) that you have been working in the following types of area since 1 March 2020.                                                             | Red zones                                                                                                                                                                           | <input type="checkbox"/> days per week                   |
|                                                                                                                                                                                                                   | Green zones                                                                                                                                                                         | <input type="checkbox"/> days per week                   |
|                                                                                                                                                                                                                   | Non-COVID zones                                                                                                                                                                     | <input type="checkbox"/> days per week                   |
| 21. Estimate the number of confirmed or suspected COVID-19 patients that you have been in contact with since the 1 <sup>st</sup> of March 2020 in any area of the hospital (Red zone or Green zone or other area) | <input type="checkbox"/> 1-10<br><input type="checkbox"/> 11-50<br><input type="checkbox"/> 51-100<br><input type="checkbox"/> >100                                                 |                                                          |
| 22. What nature of contact did you have with COVID patients?                                                                                                                                                      |                                                                                                                                                                                     |                                                          |
| 22(a)                                                                                                                                                                                                             | Performed an aerosol-generating procedure (see list above) <b>WITHOUT</b> FFP2/FFP3/N95 respirator, apron, gown, gloves                                                             | <input type="checkbox"/> Yes <input type="checkbox"/> No |
| 22(b)                                                                                                                                                                                                             | Performed an aerosol-generating procedure (see list above) <b>WITH</b> FFP2/FFP3/N95 respirator, apron, gown, gloves                                                                | <input type="checkbox"/> Yes <input type="checkbox"/> No |
| 22(c)                                                                                                                                                                                                             | Provided care within 2 metres of a COVID-19 patient <b>WITHOUT</b> performing an aerosol-generating procedure <b>WITHOUT</b> surgical mask, apron, gown, surgical gloves            | <input type="checkbox"/> Yes <input type="checkbox"/> No |
| 22(d)                                                                                                                                                                                                             | Provided care within 2 metres of a COVID-19 patient <b>WITHOUT</b> performing an aerosol-generating procedure <b>WITH</b> surgical mask, apron, gown, surgical gloves               | <input type="checkbox"/> Yes <input type="checkbox"/> No |
| 22(e)                                                                                                                                                                                                             | Carried out any other activities more than 2 metres away from a COVID-19 patient, <b>WITH</b> or <b>WITHOUT</b> FFP2/FFP3/N95 respirator/surgical mask, apron/gown, surgical gloves | <input type="checkbox"/> Yes <input type="checkbox"/> No |

**Healthcare worker related exposures**

|                                                                                                                                          |                                                                                                                                                                                                                                                                                            |
|------------------------------------------------------------------------------------------------------------------------------------------|--------------------------------------------------------------------------------------------------------------------------------------------------------------------------------------------------------------------------------------------------------------------------------------------|
| <p>23. How many healthcare worker colleagues (any staff in your group / unit / team) have developed suspected or confirmed COVID-19?</p> | <input type="checkbox"/> None that I know<br><input type="checkbox"/> 1-2<br><input type="checkbox"/> 3-5<br><input type="checkbox"/> 6-10<br><input type="checkbox"/> >10                                                                                                                 |
| <p>24. What nature of physical contact (within 2 metres distance) did you have with these healthcare workers? Tick all that apply</p>    | <input type="checkbox"/> None<br><input type="checkbox"/> While delivering patient care<br><input type="checkbox"/> In changing room<br><input type="checkbox"/> In eating area/room<br><input type="checkbox"/> In office / meeting room<br><input type="checkbox"/> Other (specify)..... |

**Infection Prevention and Control (IPC) training and practice details**

|                                                                                                                                                                                 |                                                                                                                                                                                                                                                                                                    |
|---------------------------------------------------------------------------------------------------------------------------------------------------------------------------------|----------------------------------------------------------------------------------------------------------------------------------------------------------------------------------------------------------------------------------------------------------------------------------------------------|
| <p>25. How much total IPC training on Standard and Additional Precautions relating to COVID-19 have you had at your facility since the 1<sup>st</sup> of January 2020?</p>      | <input type="checkbox"/> No COVID-19 IPC training attended<br><input type="checkbox"/> Less than an hour<br><input type="checkbox"/> 1-2 hrs<br><input type="checkbox"/> More than 2 hours                                                                                                         |
| <p>26. Have you attended the FFP2/3 respirator fit testing training?</p>                                                                                                        | <input type="checkbox"/> Yes<br><input type="checkbox"/> No                                                                                                                                                                                                                                        |
| <p>27. Do you follow IPC standard precautions as advised by Chelsea and Westminster Trust IPC guidelines when in contact with any patient or in the healthcare environment?</p> | <input type="checkbox"/> Always, as recommended<br><input type="checkbox"/> Most of the time<br><input type="checkbox"/> Occasionally<br><input type="checkbox"/> Rarely<br><input type="checkbox"/> Not aware of local IPC guidelines<br><input type="checkbox"/> No direct contact with patients |
| <p>28. Do you follow recommended hand hygiene practices?</p>                                                                                                                    | <input type="checkbox"/> Always, as recommended<br><input type="checkbox"/> Most of the time<br><input type="checkbox"/> Occasionally<br><input type="checkbox"/> Rarely                                                                                                                           |
| <p>29. Do you wear Personal Protective Equipment when indicated?</p>                                                                                                            | <input type="checkbox"/> Always, according to risk assessment<br><input type="checkbox"/> Most of the time, according to risk assessment<br><input type="checkbox"/> Occasionally<br><input type="checkbox"/> Rarely                                                                               |

**END OF QUESTIONNAIRE**

*Thank you so much for taking time to fill this questionnaire !*

**Serology Test Result (to be filled by the clinician)**

*May you kindly check that all questions above are completed , enter the SARS-CoV-2 IgM, IgG, overall result then finally enter your initials of your first and last name in the space provided below.*

|                                         |                                                                        |
|-----------------------------------------|------------------------------------------------------------------------|
| Date when test was done<br>(dd/mm/yyyy) | □□/□□/□□□□                                                             |
| SARS-CoV-2 IgM                          | <input type="checkbox"/> Negative<br><input type="checkbox"/> Positive |
| SARS-CoV-2 IgG                          | <input type="checkbox"/> Negative<br><input type="checkbox"/> Positive |
| Overall serology test result            | <input type="checkbox"/> Negative<br><input type="checkbox"/> Positive |
| Initials                                | .....                                                                  |
